# Supplementary material for: Investigation of acute-phase proteins and cytokines response in goats with contagious caprine pleuropneumonia with special reference to their diagnostic accuracy
Source: PeerJ. 2020 Nov 17;8:e10394. doi: 10.7717/peerj.10394 (PMC7678458; doi:10.7717/peerj.10394)
Supplement: Data S1 [file peerj-08-10394-s001.xlsx]

## Sheet: Sheet1
Group	Hp	SAA	Fp	IL-1α	IL-1β	TNF-α	IF-ϒ	IL-6	PCT ng/ml	CRP μg/mL	Response to tratment	Antibiotic	Antiiflammatory	Fever	anorexia	lethargy	cough
0	0.062	4.36	2.36	13.26	18.23	8.52	10.26	9.36	0.49	49.55
0	0.051	4.56	2.41	14.26	16.25	9.23	11.25	8.59	0.48	50.34
0	0	3.56	2.11	16.23	20.36	7.59	12.45	10.25	0.45	51.34
0	0.062	3.96	2.33	15.24	17.26	7.84	11.25	11.25	0.46	52.43
0	0.053	3.65	2.41	13.26	19.36	8.45	10.36	13.26	0.49	47.32
0	0.045	4.12	2.36	14.25	19.45	9.26	10.36	12.45	0.48	48.34
0	0	4.56	2.22	15.23	17.25	10.24	11.23	11.45	0.53	49.45									0=control
0	0.06	5.25	2.13	16.25	18.26	9.25	10.36	10.45	0.52	50.32									1=CCPP
0	0.062	5.26	2.21	15.23	19.24	10.11	9.36	9.66	0.49	52.43									0= non resposive
0	0.054	5.21	2.31	14.26	20.36	9.25	8.25	8.99	0.5	49.55									1= responsive
0	0.063	4.88	2.24	13.26	18.26	7.15	8.79	8.87	0.45	47.56
0	0	4.75	2.31	10.26	19.45	7.45	9.56	10.36	0.51	53.45
0	0.054	4.65	2.41	11.25	17.26	8.45	8.45	11.36	0.53	52.34
0	0.062	3.95	2.42	12.36	16.54	8.63	10.36	12.25	0.45	49.33
0	0.048	3.75	2.51	14.25	16.98	9.34	11.25	10.25	0.53	48.56
0	0.062	4.22	2.52	12.36	18.79	7.36	10.36	9.36	0.54	50.68
0	0.063	5.12	2.41	10.26	17.49	8.26	8.69	10.45	0.55	53.24
0	0.057	1.21	2.36	11.45	19.26	8.26	9.56	11.25	0.53	52.34
0	0.54	4.87	2.34	12.45	20.14	8.77	9.58	10.36	0.45	50.34
0	0.47	4.56	2.51	14.26	19.56	9.21	8.59	12.45	0.54	49.34
1	1.6.3	29.36	4.23	28.26	31.26	19.36	16.36	17.36	1.72	120.34	1	tulthromycin	Flunixine	1	1	1	1
1	1.81	28.26	3.26	25.36	30.26	20.36	15.34	18.26	1.63	111.25	1	tulthromycin	Flunixine	1	1	1	0
1	1.95	28.35	3.21	26.36	31.26	18.36	9.36	19.36	1.67	109.35	1	tulthromycin	Flunixine	1	1	1	1
1	2.42	32.36	2.51	27.26	32.45	19.36	9.56	18.25	1.93	130.36	0	Tetracyclines	Flunixine	1	1	1	1
1	0	30.26	2.41	12.36	17.25	18.54	8.26	8.9	2.12	108.25	1	tulthromycin	Flunixine	1	1	1	1
1	0.065	31.25	2.36	13.25	19.26	8.25	15.26	10.25	2.1	120.46	1	danofloxacin	Pheyle	1	1	1	0
1	0	31.54	4.25	11.25	18.26	19.36	16.25	10.33	1.98	125.35	1	tulthromycin	Flunixine	1	1	1	1
1	0	29.26	4.23	14.26	19.26	18.36	17.26	11.24	2.21	100.45	1	tulthromycin	Pheyle	1	1	1	1
1	1.68	4.25	4.12	29..63	30.26	19.25	15.24	17.25	1.94	108.37	1	tulthromycin	Flunixine	1	1	1	0
1	1.87	5.21	3.69	28.26	31.26	20.31	16.36	18.23	1.88	110.38	1	danofloxacin	Flunixine	1	1	1	1
1	2.14	29.36	3.59	27.26	32.15	9.33	16.77	17.25	1.99	112.87	1	danofloxacin	Flunixine	1	1	1	1
1	2.15	29.34	3.56	25.36	30.26	8.74	17.25	18.36	1.78	120.34	1	Tetracyclines	Pheyle	1	1	1	1
1	2.36	33.45	3.88	26.35	31.26	20.31	9.36	19.48	1.53	128.34	0	Tetracyclines	Pheyle	1	1	1	0
1	1.85	30.26	4.21	28.26	32.15	19.25	8.25	18.25	1.99	110.32	1	danofloxacin	Pheyle	1	1	1	1
1	1.97	31.26	4.11	27.26	30.12	20.14	7.59	18.23	1.88	111.43	1	tulthromycin	Pheyle	1	1	1	1
1	1.78	5.12	3.25	28.36	29.36	18.57	8.26	17.46	2.1	112.31	1	danofloxacin	Flunixine	1	1	1	0
1	1.6	28.26	2.33	29.36	32.26	17.25	9.36	18.23	2.2	100.25	1	danofloxacin	Flunixine	1	1	1	1
1	2.41	32.36	2.42	26.35	33.26	22.36	11.36	20.35	2.5	133.21	0	Tetracyclines	Pheyle	0	1	1	0
1	2.41	35.45	2.51	29.36	30.21	18.26	10.36	19.45	2.42	130.26	0	danofloxacin	Pheyle	1	1	1	1
1	2.46	33.25	3.62	28.26	30.12	19.45	17.26	20.36	2.54	128.34	0	Tetracyclines	Pheyle	1	1	1	0
1	2.66	35.26	3.96	27.36	31.25	18.45	18.36	19.23	1.98	120.37	0	danofloxacin	Flunixine	0	1	1	0
1	2.22	30.26	4.12	25.36	32.45	19.25	16.36	18.45	1.77	117.26	1	danofloxacin	Flunixine	1	1	1	1
1	1.94	32.26	4.52	25.36	30.45	17.25	15.26	17.44	1.88	120.35	1	tulthromycin	Flunixine	1	1	1	1
1	1.97	27.26	3.65	24.36	31.25	18.39	18.25	15.66	1.83	110.39	1	danofloxacin	Flunixine	1	1	1	0
1	1.85	4.55	2.36	26.35	30.26	20.14	16.36	18.45	1.95	100.78	1	tulthromycin	Flunixine	1	1	1	0
1	0	29.36	2.45	12.36	17.55	20.15	17.46	9.36	1.62	101.34	1	tulthromycin	Flunixine	1	1	1	1
1	0.065	28.26	2.51	25.36	33.26	8.36	17.23	17.45	2.1	90.23	1	danofloxacin	Pheyle	1	1	1	1
1	2.69	33.15	3.69	24.26	30.26	9.25	16.35	19.36	2.6	129.87	0	Tetracyclines	Pheyle	1	1	1	0
1	1.96	31.26	4.12	26.35	30.15	20.67	18.26	15.24	1.9	114.57	1	danofloxacin	Pheyle	1	1	1	1
1	1.87	28.26	4.23	25.36	32.26	9.65	17.25	15.47	1.89	100.23	1	tulthromycin	Flunixine	1	1	1	1
1	2.1	29.36	4.22	24.36	31.45	19.45	18.23	16.33	1.77	120.35	1	danofloxacin	Flunixine	1	1	1	1
1	2.37	32.36	3.96	28.36	29.35	18.46	16.25	16.42	2.34	132.46	0	Tetracyclines	Pheyle	1	1	1	1
1	1.98	27.36	3.48	27.26	29.45	19.54	17.45	15.44	1.98	52.87	1	tulthromycin	Flunixine	1	1	1	1
1	1.63	29.36	3.78	26.36	30.26	18.77	16.25	15.36	1.77	120.34	1	tulthromycin	Flunixine	1	1	1	1
1	1.87	30.26	3.66	25.36	31.06	20.15	18.23	17.23	1.68	50.32	1	Tetracyclines	Flunixine	0	1	0	0
1	1.77	31.26	2.51	24.56	32.15	19.54	10.36	17.11	1.87	112.34	1	tulthromycin	Pheyle	1	1	1	1
1	0	4.9	3,98	28.32	29.34	20.11	10.23	9.44	1.95	117.98	1	tulthromycin	Flunixine	1	1	1	1
1	1.96	27.33	3.49	28.26	29.25	19.44	18.45	15.45	1.99	51.87	1	tulthromycin	Flunixine	1	1	1	1
